## Comparison of renal and salt gland function in three species of wild ducks

Darin C. Bennett and Maryanne R. Hughes

Department of Zoology, 6270 University Boulevard, University of British Columbia, Vancouver, BC, V6T 1Z4, Canada

\*Author for correspondence (e-mail: dcbennet@interchange.ubc.ca)

Accepted 23 June 2003

### Summary

Three processes central to osmoregulation of marine birds were compared in three species of ducks that differ in habitat affinity, diet and saline tolerance. These processes are filtration of  $\text{Na}^+$  and water from the plasma by the kidneys, their reabsorption along the renal tubules, and secretion by the salt glands. Barrow's goldeneyes *Bucephala islandica*, the most marine species, have the highest rates for all three processes and only this species can secrete all the infused salt *via* the salt glands. Rates of all three processes are lower in mallards *Anas platyrhynchos*, the most freshwater species. Following saline acclimation, mallards could excrete all the infused  $\text{Na}^+$  by a combined  $\text{Na}^+$  excretion of the kidneys and salt glands. Canvasbacks *Aythya valisineria*, despite being

more saline tolerant than mallards, are unable to excrete all the infused  $\text{Na}^+$ . They produce a large volume of urine (like mallards) that has a low  $[\text{Na}^+]$  (like goldeneyes). Salt gland secretion  $\text{Na}^+$  concentration did not differ among the three species, but only goldeneyes secrete at a rate sufficient to eliminate all infused  $\text{Na}^+$  *via* the salt glands. Differences in saline tolerance of these ducks species cannot be fully explained by differences in their filtration, reabsorption and secretion of  $\text{Na}^+$  and water, suggesting that the intestinal tract plays an important role.

Key words: osmoregulation, kidney, salt gland, mallard, *Anas platyrhynchos*, canvasback, *Aythya valisineria*, Barrow's goldeneye, *Bucephala islandica*.

### Introduction

All marine birds have salt glands that, together with the kidneys, maintain body fluid homeostasis, despite the excess sodium chloride ( $\text{NaCl}$ ) they ingest. They have similar total body water, but twice the daily water flux of birds that lack salt glands (Hughes et al., 1987; Nagy and Peterson, 1988). Among species that produce highly concentrated salt gland secretion (SGS), the salinity of the drinking water has no effect on drinking rate (Harriman, 1967; Walter and Hughes, 1978; Bennett et al., 2003). Such birds become dehydrated only when they drink water more concentrated than their SGS (Bennett et al., 2003).

Three processes central to osmoregulation in marine birds are filtration of sodium ( $\text{Na}^+$ ) and water from the plasma by the kidneys, reabsorption of filtered water and  $\text{Na}^+$  by cells along the renal tubules, and secretion of  $\text{Na}^+$  by the salt glands. These processes must have evolved simultaneously to adapt to the osmoregulatory requirements of birds that use habitats of widely disparate salinities, ranging from freshwater to full-strength seawater. Renal filtration of marine birds is unaffected by either acclimation to saline or acute saline loading and almost all the filtered  $\text{Na}^+$  (and water) is reabsorbed along the renal tubules, regardless of plasma  $[\text{Na}^+]$  (Hughes, 1995). The reabsorbed  $\text{Na}^+$  can be secreted by the salt glands in less water than was imbibed with it. The concentration and rate of salt gland secretion determines the amount of osmotically free

water it can generate for the birds' other physiological processes (Schmidt-Nielsen, 1960).

Many species of ducks switch seasonally between freshwater and saline habitats. When the drinking water of Pekin ducks is changed from freshwater to saline, their salt glands hypertrophy, enhancing their capacity to excrete salt (Schmidt-Nielsen and Kim, 1964), but the glomerular filtration rate (GFR) is little affected (Holmes et al., 1968) and the fractional reabsorption of  $\text{Na}^+$  is reduced (Holmes et al., 1968; Hughes et al., 1989). Whether these responses occur in wild ducks has not been reported.

Therefore, in this study, we compared simultaneous kidney and salt gland function in three species of ducks: freshwater mallards (tribe *Anatini*, *Anas platyrhynchos*), estuarine canvasbacks (tribe *Aythiini*, *Aythya valisineria*) and marine Barrow's goldeneyes (tribe *Mergini*, *Bucephala islandica*). Goldeneyes, the most saline-tolerant, have larger kidney mass (Kalisiniska et al., 1999; D. C. Bennett and M. R. Hughes, unpublished data) and extracellular fluid volume (Bennett, 2002) than mallards, the least saline-tolerant species. Canvasbacks have large kidneys like the goldeneyes (D. C. Bennett and M. R. Hughes, unpublished data), but a smaller extracellular fluid volume, like the mallards (Bennett, 2002). Water flux rates of all three species (Bennett, 2002) are roughly twice the rate predicted allometrically for seabirds (Hughes et

Table 1. *Glomerular filtration rate (GFR) and effective renal plasma flow (ERPF) of birds with and without salt glands in relation to habitat type and diet*

| Species                             | Mass (g) | GFR (ml min <sup>-1</sup> ) | ERPF (ml min <sup>-1</sup> ) | Habitat | Diet | Source    |
|-------------------------------------|----------|-----------------------------|------------------------------|---------|------|-----------|
| Without salt glands:                |          |                             |                              |         |      |           |
| Order Struithioniformes             |          |                             |                              |         |      |           |
| <i>Dromaius novaehollandiae</i>     | 40700    | 16.2                        |                              | TA      | O    | 1         |
| Order Galliformes                   |          |                             |                              |         |      |           |
| <i>Alectoris chukar</i>             | 511.7    | 0.58                        |                              | TA      | O    | 2         |
| <i>Coturnix chinensis</i>           | 51.4     | 0.55                        | 1.50                         | TM      | O    | 3         |
| <i>Coturnix pectoralis</i>          | 107.3    | 0.68                        | 4.07                         | TA      | H    | 3         |
| <i>Coturnix japonica</i>            | 122.3    | 1.55                        |                              | TM      | H    | 4         |
| <i>Gallus gallus var. dom.</i>      | 1890     | 4.13                        | 32.32                        | TM      | O    | 5–33      |
| <i>Meleagris pavo</i>               | 7400     | 5.68                        |                              | TM      | H    | 34, 35    |
| <i>Callipepla gambelii</i>          | 158.4    | 0.23                        |                              | TA      | H    | 36–42     |
| Order Psittaciformes                |          |                             |                              |         |      |           |
| <i>Melopsittacus undulatus</i>      | 37.5     | 0.14                        |                              | TA      | O    | 43        |
| <i>Cacatua roseicapilla</i>         | 335.9    | 0.79                        | 3.76                         | TA      | O    | 44        |
| Order Trochiliformes                |          |                             |                              |         |      |           |
| <i>Calypta anna</i>                 | 5.1      | 0.04                        |                              | TM      | N    | 45        |
| Order Columbiformes                 |          |                             |                              |         |      |           |
| <i>Zenaidura macroura</i>           | 119      | 0.27                        | 2.05                         | TM      | H    | 46        |
| <i>Columbia livia</i>               | 569.3    | 4.04                        |                              | TM      | H    | 47        |
| Order Falconiformes                 |          |                             |                              |         |      |           |
| <i>Falco sparverius</i>             | 126.0    | 0.27                        |                              | TM      | C    | 48        |
| Order Passeriformes                 |          |                             |                              |         |      |           |
| <i>Anthochaera carunculata</i>      | 99       | 0.35                        |                              | TM      | N    | 49        |
| <i>Sturnus vulgaris</i>             | 77.1     | 0.50                        | 4.27                         | TM      | O    | 50–57     |
| <i>Nectarinia osea</i>              | 5.8      | 0.03                        |                              | TM      | N    | 58        |
| <i>Passer domesticus</i>            | 22.8     | 0.13                        |                              | TM      | H    | 59        |
| <i>Melospiza melodia</i>            | 18.4     | 0.13                        |                              | TM      | O    | 60        |
| With salt glands:                   |          |                             |                              |         |      |           |
| Order Anseriformes                  |          |                             |                              |         |      |           |
| <i>Branta canadensis</i>            | 3670     | 6.24                        |                              | FW      | H    | 61        |
| <i>Anas platyrhynchos</i>           | 983      | 2.70                        | 11.00                        | FW      | O    | 61–63     |
| <i>Anas platyrhynchos var. dom.</i> | 2513     | 7.44                        | 52.85                        | FW      | O    | 64–72     |
| <i>Aythya valisineria</i>           | 1052     | 2.27                        | 5.23                         | FW      | O    | 62        |
| <i>Bucephala islandica</i>          | 767      | 4.06                        | 10.63                        | MR      | C    | 62        |
| Order Charadriiformes               |          |                             |                              |         |      |           |
| <i>Larus argentatus</i>             | 1000     | 4.40                        |                              | MR      | C    | 73        |
| <i>Larus dominicanus</i>            | 905      | 3.09                        |                              | MR      | C    | 74        |
| <i>Larus glaucescens</i>            | 900      | 3.84                        | 13.61                        | MR      | C    | 61, 75–77 |

TA, terrestrial arid; TM, terrestrial mesic; FW, freshwater; MR, marine; H, herbivore; O, omnivore; N, nectivore; C, carnivore.

Source: <sup>1</sup>Dawson et al. (1991), <sup>2</sup>Goldstein (1990), <sup>3</sup>Roberts et al. (1985), <sup>4</sup>Roberts and Hughes (1983), <sup>5</sup>Berger et al. (1960), <sup>6</sup>Dantzler (1966), <sup>7</sup>Glahn et al. (1988a,b), <sup>8</sup>Gregg and Wideman (1990), <sup>9</sup>Hyden and Knutson (1959), <sup>10</sup>Korr (1939), <sup>11</sup>Leary et al. (1998), <sup>12</sup>Nechay and Nechay (1959), <sup>13</sup>Orloff and Davidson (1959), <sup>14</sup>Pitts (1938), <sup>15</sup>Pitts and Korr (1938), <sup>16</sup>Radin et al. (1993), <sup>17</sup>Roberts (1991a), <sup>18</sup>Roberts (1992), <sup>19</sup>Sanner (1965), <sup>20</sup>Shannon (1938a,b), <sup>21</sup>Shideman et al. (1981), <sup>22</sup>Singh and Battacharyya (1983), <sup>23</sup>Skadhauge (1964), <sup>24</sup>Skadhauge and Schmidt-Nielsen (1967), <sup>25</sup>Sperber (1960), <sup>26</sup>Svendsen and Skadhauge (1976), <sup>27</sup>Sykes (1960a,b), <sup>28</sup>Vena et al. (1990), <sup>29</sup>Wideman and Gregg (1988), <sup>30</sup>Wideman and Laverty (1986), <sup>31</sup>Wideman and Nissley (1992), <sup>32</sup>Wideman and Satnick (1989), <sup>33</sup>Wideman et al. (1987), <sup>34</sup>Palmore et al. (1981), <sup>35</sup>Vogel et al. (1965), <sup>36</sup>Anderson (1980), <sup>37</sup>Braun (1976), <sup>38</sup>Braun and Dantzler (1972), <sup>39</sup>Braun and Dantzler (1974), <sup>40</sup>Braun and Dantzler (1975), <sup>41</sup>Williams and Braun (1996), <sup>42</sup>Williams et al. (1991), <sup>43</sup>Krag and Skadhauge (1972), <sup>44</sup>Roberts (1991b), <sup>45</sup>S. Medler (unpublished data), <sup>46</sup>Shoemaker (1967), <sup>47</sup>Chan et al. (1972), <sup>48</sup>Lyons and Goldstein (2002), <sup>49</sup>Goldstein and Bradshaw (1998b), <sup>50</sup>Braun (1978), <sup>51</sup>Clark and Wideman (1980), <sup>52</sup>Laverty and Dantzler (1982), <sup>53</sup>Laverty and Dantzler (1983), <sup>54</sup>Laverty and Wideman (1989), <sup>55</sup>Roberts and Dantzler (1989), <sup>56</sup>Roberts and Dantzler (1992), <sup>57</sup>Wideman et al. (1980), <sup>58</sup>T. J. McWhorter (unpublished data), <sup>59</sup>Goldstein and Braun (1988), <sup>60</sup>Goldstein and Rothschild (1993), <sup>61</sup>Hughes (1980), <sup>62</sup>This study, <sup>63</sup>Hughes et al. (1999), <sup>64</sup>Bennett et al. (2000), <sup>65</sup>Bradley and Holmes (1971), <sup>66</sup>Gerstberger et al. (1985), <sup>67</sup>Holmes and Adams (1963), <sup>68</sup>Holmes et al. (1968), <sup>69</sup>Hughes et al. (1989), <sup>70</sup>Schutz et al. (1992), <sup>71</sup>Simon and Gray (1991), <sup>72</sup>Thomas and Phillips (1975), <sup>73</sup>Douglas (1966), <sup>74</sup>Gray and Erasmus (1988), <sup>75</sup>Hughes (1995), <sup>76</sup>Hughes et al. (1993), <sup>77</sup>Raveendran (1987).

al., 1987; Nagy and Peterson, 1988). We hypothesize that (1) neither saline acclimation nor acute saline loading affect GFR in any of the three species, and (2) saline tolerance is determined by the efficiency of renal tubular reabsorption of water and  $\text{Na}^+$ , and secretion of  $\text{Na}^+$  by the salt glands.

## Materials and methods

### Animals

24 adult ducks (eight mallards, *Anas platyrhynchos* L., eight Canvasbacks, *Aythya valisineria* Gray, and eight Barrow's goldeneyes, *Bucephala islandica* Gmelin) were held in large partially covered outdoor enclosures at the University of British Columbia Animal Care Facility. Groups included equal numbers of males and females. Water was presented in 70 liter plastic wading pools and completely replenished twice daily. Half the ducks of each species drank freshwater, while the other half drank  $300 \text{ mmol l}^{-1}$  NaCl. They ate duck pellets (17% protein, 2750 kcal  $\text{kg}^{-1}$ ; Buckerfield's, Abbotsfield, BC, Canada) containing 12.7% water and 68, 145 and  $190 \text{ mmol l}^{-1} \text{ kg}^{-1}$   $\text{Na}^+$ ,  $\text{K}^+$  and  $\text{Cl}^-$ , respectively.

### Experiments

These experiments followed the guidelines set forth by the Canadian Council on Animal Care. Each duck was fasted overnight and weighed. Venous catheters were placed in the left and right tibiotarsal veins (for infusion of saline and markers and for blood sampling, respectively) and were kept patent with heparinized isotonic saline. The duck's wings were lightly bound to the body with Velcro straps and the bird was placed on a foam-lined restrainer. The duck's head projected into a large funnel that directed SGS into preweighed glass vials. The SGS of poor secretors was collected by capillary tube. A cannula inserted into the cloaca diverted ureteral urine into a preweighed plastic tube.

An initial 1 ml blood sample was taken and the duck was given a priming injection of 37 kBq of  $^{14}\text{C}$ -inulin (marker for GFR) and 370 kBq of  $^3\text{H}$ -para-aminohippuric acid ( $^3\text{H}$ -PAH; marker for effective renal plasma flow, ERPF). An infusion of  $75 \text{ mmol l}^{-1}$  NaCl, containing  $0.15 \text{ kBq ml}^{-1}$  of  $^{14}\text{C}$ -inulin and  $1.1 \text{ kBq ml}^{-1}$  of  $^3\text{H}$ -PAH, was begun ( $0.175 \text{ ml min}^{-1}$ ). After a 1 h equilibration period, four 10–15 min urine samples

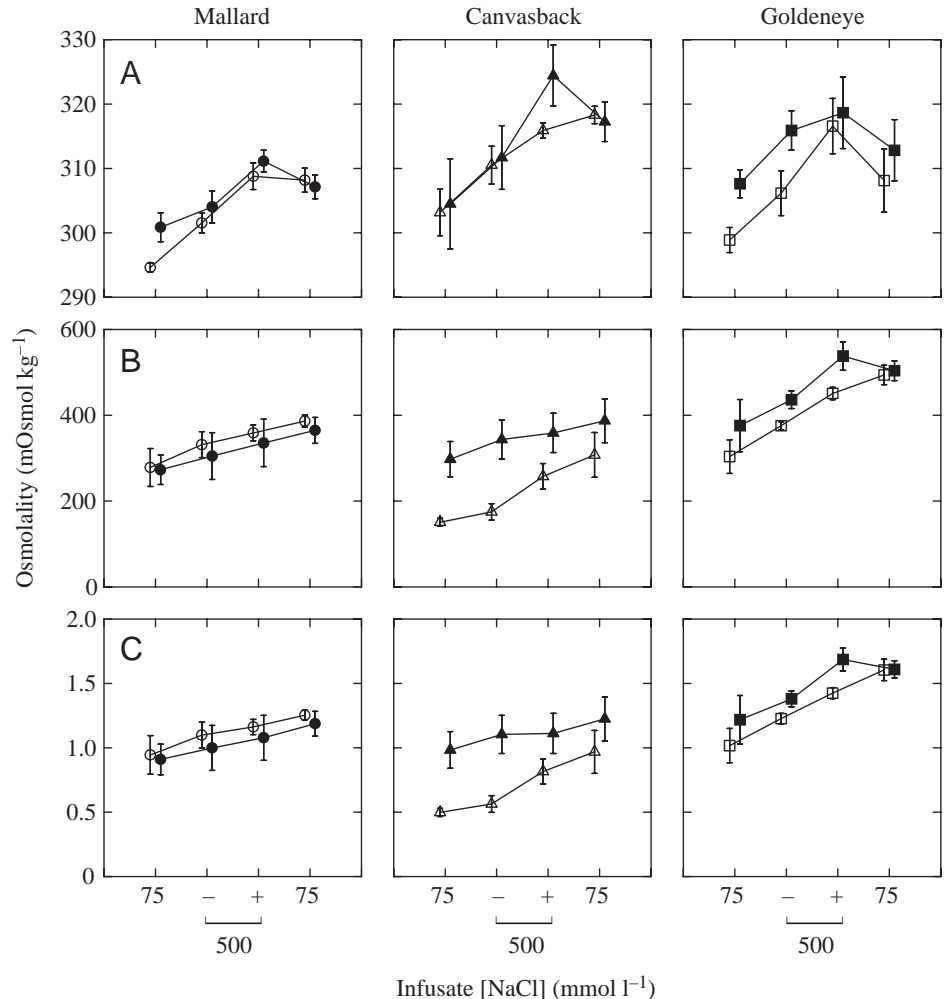

Fig. 1. Effect of hypotonic and hypertonic saline infusion ( $75$  and  $500 \text{ mmol l}^{-1}$  NaCl, respectively) on (A) plasma and (B) urine osmolality and (C) their ratio (Urine:Plasma) in freshwater (open symbols) and saline-acclimated (filled symbols) in mallards *Anas platyrhynchos* (circles), canvasbacks *Aythya valisineria* (triangles) and Barrow's goldeneyes *Bucephala islandica* (squares). The period of  $500 \text{ mmol l}^{-1}$  NaCl infusion was subdivided into two parts: the period prior to secretion (–) and the period of secretion (+). Values are means  $\pm$  S.E.M. ( $N=4$  ducks per treatment).

were collected. Then infusate NaCl concentration was increased to  $500 \text{ mmol l}^{-1}$  and urine was collected at 10–20 min intervals until the duck began to secrete. Four simultaneous 10–20 min collections of urine and SGS were made. Finally, infusate NaCl concentration was reduced to  $75 \text{ mmol l}^{-1}$  and three simultaneous 10–20 min collections of urine and SGS were made. Urine and SGS volumes were determined by weighing their tubes before and after the collection period. A blood sample ( $0.4 \text{ ml}$ ) was taken at the mid-point of each collection period.

Blood, urine and SGS samples were centrifuged for 3 min at  $15\,600 g$  and the supernatant fluids were transferred into  $1.5 \text{ ml}$  centrifuge tubes and stored at  $-20^\circ\text{C}$  until assayed. Plasma, urine and infusate  $^3\text{H}$  and  $^{14}\text{C}$  concentrations were determined using a Beckman LS 6500 liquid scintillation counter (Fullerton CA, USA). Determinations of  $[\text{Na}^+]$  and

[K<sup>+</sup>] of plasma, urine and SGS were made by cesium internal standard flame photometry (Model 943, Instrumentation Laboratory S.p.A, Milano, Italy); and osmolality (Osm) of the plasma and urine by vapor pressure osmometry (Model 5500; Wescor Inc., Logan UT, USA). Subscripts pl, u and sgs designate plasma, urine and salt gland secretion, respectively.

#### Calculations and statistics

All calculations are as described in Pitts (1968) and Goldstein (1993). GFR and ERPF were calculated as:

$$\text{GFR} = [\text{inulin}]_{\text{u}}\text{UFR} / [\text{inulin}]_{\text{pl}}$$

and

$$\text{ERPF} = [\text{PAH}]_{\text{u}}\text{UFR} / [\text{PAH}]_{\text{pl}},$$

where [marker]<sub>u</sub> and [marker]<sub>pl</sub> are the marker (inulin or PAH) concentrations in the urine and plasma, respectively, and UFR

is the urine flow rate. Fractional reabsorption of water (FR<sub>H2O</sub>) was calculated as:

$$\text{FR}_{\text{H}_2\text{O}} = (1 - [\text{inulin}]_{\text{pl}} / [\text{inulin}]_{\text{u}}) \times 100$$

and fractional reabsorption of Na<sup>+</sup> and K<sup>+</sup> (FR<sub>Na</sub> and FR<sub>K</sub>, respectively) was calculated as:

$$\text{FR}_{\text{ion}} = (\text{GFR}[\text{ion}]_{\text{pl}} - \text{UFR}[\text{ion}]_{\text{u}}) / \text{GFR}[\text{ion}]_{\text{pl}},$$

where [ion]<sub>pl</sub> and [ion]<sub>u</sub> represent the Na<sup>+</sup> and K<sup>+</sup> concentrations of the plasma and urine, respectively.

All analyses and calculations were made on each sample collected and were, within individuals, averaged for each infusate, so that each infusate period for an individual duck is represented by a single value. The 500 mmol l<sup>-1</sup> NaCl infusion was divided into two periods: prior to secretion and active secretion. Data are reported as means ± standard errors (S.E.M.)

and statistically analyzed using SYSTAT 9 for Windows (SPSS Science, Chicago, IL, USA). Differences among species and infusion periods and between treatments and sexes were assessed by repeated-measures analysis of variance (ANOVA). Significance is claimed at *P*<0.05, although higher *P* values suggesting trends are also reported. Relationships among variables were examined using correlation and stepwise linear regression.

To examine the relationships of GFR to habitat and diet of birds, we collected GFR data on 27 species of adult non-dehydrated birds, disregarding the methods used to measure GFR (Table 1). Data were obtained from original sources whenever possible. For each species we calculated a single data point that is the mean of all reported values. GFR was standardized by regressing it on body mass, after log<sub>10</sub>-log<sub>10</sub> transformation, and analysing the residuals by ANOVA.

## Results

### Plasma composition

Overall, Osm<sub>pl</sub>, [Na]<sub>pl</sub> and [K]<sub>pl</sub> varied significantly among species and infusion periods, but not between the treatments or sexes. Mallards had a lower Osm<sub>pl</sub> (*P*<0.06; Fig. 1) and [Na]<sub>pl</sub> (*P*<0.002; Fig. 2) and a higher [K]<sub>pl</sub> (*P*<0.002; Fig. 3) than both canvasbacks and goldeneyes. Infusion of hypertonic saline significantly

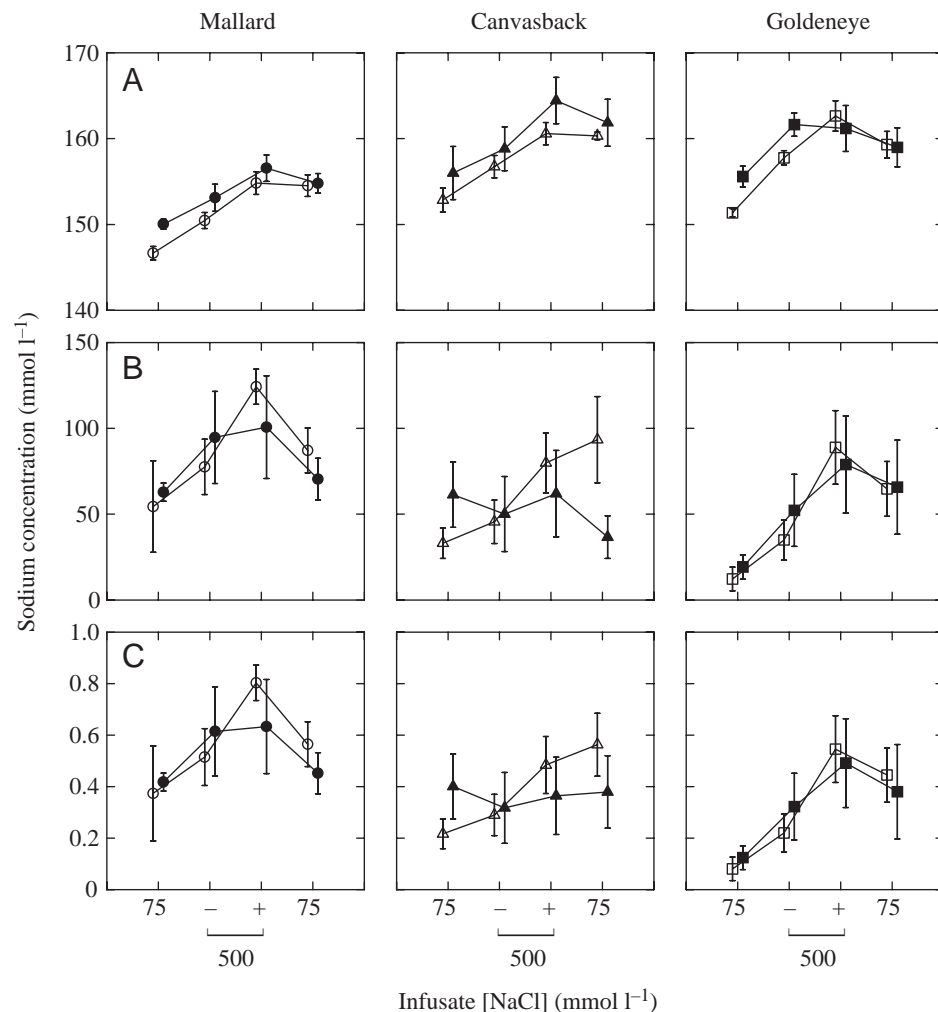

Fig. 2. Effect of hypotonic and hypertonic saline infusion (75 and 500 mmol l<sup>-1</sup> NaCl, respectively) on (A) plasma and (B) urine sodium concentration and (C) their ratio (Urine:Plasma) in freshwater (open symbols) and saline-acclimated (filled symbols) mallards *Anas platyrhynchos* (circles), canvasbacks *Aythya valisineria* (triangles) and Barrow's goldeneyes *Bucephala islandica* (squares). The period of 500 mmol l<sup>-1</sup> NaCl infusion was subdivided into two parts: the period prior to secretion (-) and the period of secretion (+). Values are means ± S.E.M. (*N*=4 ducks per treatment).

increased  $\text{Osm}_{\text{pl}}$ ,  $[\text{Na}]_{\text{pl}}$  and  $[\text{K}]_{\text{pl}}$  in all three species and these remained high during active salt secretion.  $\text{Osm}_{\text{pl}}$  and  $[\text{Na}]_{\text{pl}}$ , but not  $[\text{K}]_{\text{pl}}$ , decreased after the infusion of hypotonic 75  $\text{mmol l}^{-1}$  NaCl was reinstated.

#### Kidney function

GFR was significantly greater in goldeneyes than in either mallards or canvasbacks ( $P < 0.005$ ) and differed between freshwater and saline-acclimated ducks only in canvasbacks (Fig. 4), due mainly to lower GFR in freshwater females. GFR did not vary among the infusion periods in any species ( $P > 0.5$ ). ERPF was significantly lower in canvasbacks than in either mallards or goldeneyes ( $P < 0.008$ ). When ducks were infused with hypertonic saline, ERPF increased only in mallards ( $P < 0.03$ ; Fig. 4). Neither saline acclimation nor sex affected ERPF.

Fractional reabsorption of water and  $\text{Na}^+$  varied significantly among the three species ( $P < 0.02$  and  $P < 0.0004$ , respectively; Fig. 5). They were highest in goldeneyes, lowest in canvasbacks and intermediate in mallards (Fig. 5). Fractional reabsorption of water and  $\text{Na}^+$  of mallards was not affected by saline acclimation, sex or infusate concentration, but both tended to be higher in saline-acclimated canvasbacks ( $P < 0.08$  and  $P < 0.01$ , respectively), due almost exclusively to the low values of one freshwater female. In goldeneyes, fractional reabsorption of water increased ( $P < 0.005$ ) and reabsorption of  $\text{Na}^+$  decreased ( $P < 0.002$ ) with infusion period (Fig. 5). Fractional reabsorption of  $\text{K}^+$  did not differ among or within species, except that it was significantly lower in freshwater mallards during the final infusion of 75  $\text{mmol l}^{-1}$  NaCl (Fig. 5). Goldeneyes had lower UFR than either mallards or canvasbacks ( $P < 0.01$ ). UFR was affected by saline only in canvasbacks, and was lower in saline-acclimated ducks ( $P = 0.04$ ) and reduced by saline infusion in freshwater ducks ( $P < 0.01$ ; Fig. 4).

Overall,  $\text{Osm}_{\text{u}}$  (Fig. 1) and  $[\text{K}]_{\text{u}}$  (Fig. 3), but not  $[\text{Na}]_{\text{u}}$  (Fig. 2), varied among species ( $P = 0.0007$ ,  $P = 0.0005$  and  $P = 0.14$ , respectively). Goldeneyes had the highest  $\text{Osm}_{\text{u}}$  and  $[\text{K}]_{\text{u}}$  and, together with canvasbacks, the lowest  $[\text{Na}]_{\text{u}}$ . Canvasbacks also have the lowest  $\text{Osm}_{\text{u}}$  and  $[\text{K}]_{\text{u}}$ .  $\text{Osm}_{\text{u}}$ ,

$[\text{Na}]_{\text{u}}$  and  $[\text{K}]_{\text{u}}$  varied significantly among infusion periods (all  $P < 0.00001$ ; Figs 1–3), but only  $\text{Osm}_{\text{u}}$  varied between treatments ( $P = 0.04$ ), due primarily to lower  $\text{Osm}_{\text{u}}$  of freshwater canvasbacks (Fig. 1). During hypertonic saline infusion, all three species significantly increased  $\text{Osm}_{\text{u}}$  and it remained high during active salt secretion.  $[\text{Na}]_{\text{u}}$  and  $[\text{K}]_{\text{u}}$  increased in mallards and goldeneyes regardless of their drinking water regime. In canvasbacks, only freshwater ducks increased  $[\text{Na}]_{\text{u}}$  and none increased  $[\text{K}]_{\text{u}}$ .

Urine flow rate is correlated to both GFR and fractional reabsorption of water ( $\text{FR}_{\text{H}_2\text{O}}$ ) in all three species (Fig. 6). UFR and GFR were positively correlated in mallards and goldeneyes, but not in canvasbacks (Fig. 6). Stepwise linear regression indicated that UFR of mallards and goldeneyes was predicted by a combination of both GFR and  $\text{FR}_{\text{H}_2\text{O}}$ :

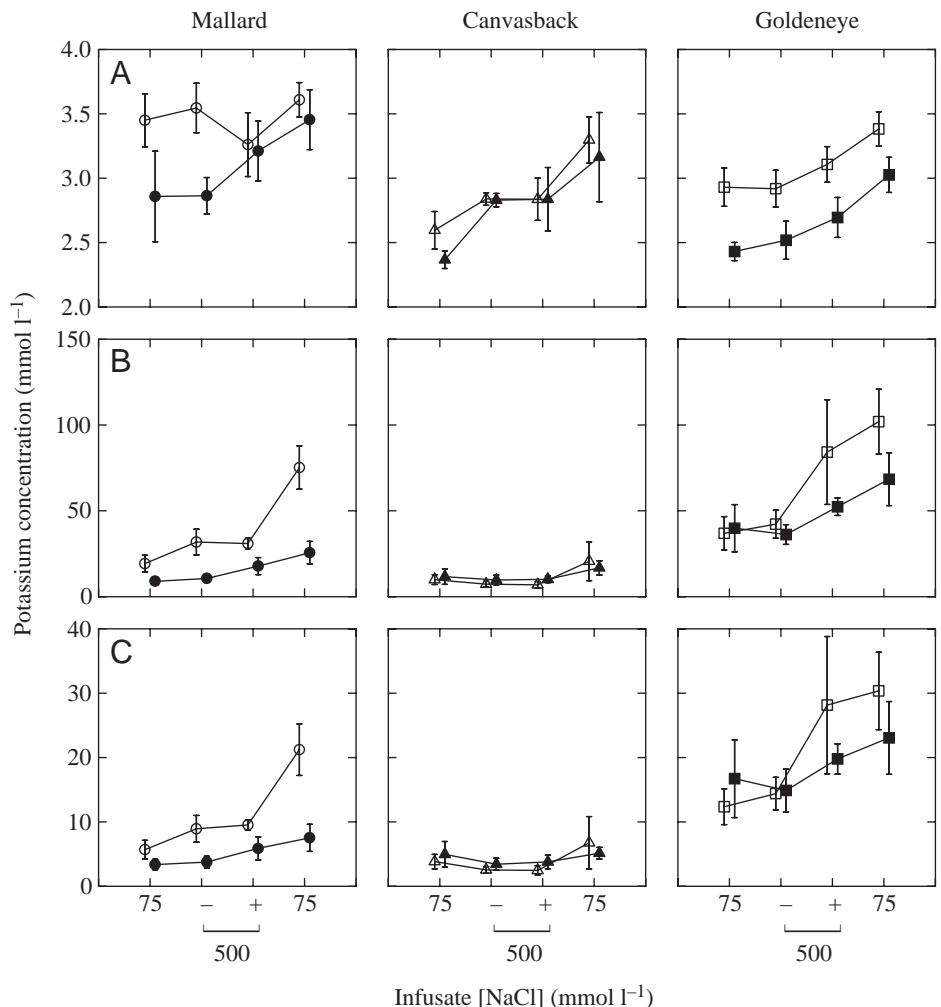

Fig. 3. Effect of hypotonic and hypertonic saline infusion (75 and 500  $\text{mmol l}^{-1}$  NaCl, respectively) on (A) plasma and (B) urine potassium concentration and (C) their ratio (Urine:Plasma) in freshwater (open symbols) and saline-acclimated (filled symbols) mallards *Anas platyrhynchos* (circles), canvasbacks *Aythya valisineria* (triangles) and Barrow's goldeneyes *Bucephala islandica* (squares). The period of 500  $\text{mmol l}^{-1}$  NaCl infusion was subdivided into two parts: the period prior to secretion (-) and the period of secretion (+). Values are means  $\pm$  S.E.M. ( $N = 4$  ducks per treatment).



$$\text{Mallards: UFR} = 2.0 + (0.039 \times \text{GFR}) - (0.021 \times \text{FR}_{\text{H}_2\text{O}}),$$

$$r = 0.83, P < 0.0001,$$

$$\text{Goldeneyes: UFR} = 3.6 + (0.012 \times \text{GFR}) - (0.036 \times \text{FR}_{\text{H}_2\text{O}}),$$

$$r = 0.95, P < 0.0001,$$

and could be similarly predicted in canvasbacks if one freshwater female were excluded:

$$\text{Canvasbacks: UFR} = 1.6 + (0.021 \times \text{GFR}) - (0.016 \times \text{FR}_{\text{H}_2\text{O}}),$$

$$r = 0.81, P < 0.0001,$$

otherwise UFR of canvasbacks was predicted solely by  $\text{FR}_{\text{H}_2\text{O}}$ .

### Salt gland function

The time required to initiate secretion did not vary among the species ( $P=0.12$ ) nor was it affected by treatment ( $P=0.89$ ) or sex ( $P=0.35$ ). It required  $59.3 \pm 3.8$  min ( $N=24$  ducks) of

infusion ( $500 \text{ mmol l}^{-1}$  NaCl at  $0.175 \text{ ml min}^{-1}$ ) to initiate secretion. Freshwater mallards and one freshwater female canvasback produced only a trace of SGS.  $[\text{Na}^+]_{\text{sgs}}$  did not vary among the species ( $P=0.56$ ) or between the sexes ( $P=0.23$ ). Saline acclimation increased  $[\text{Na}^+]_{\text{sgs}}$  of mallards and goldeneyes ( $P=0.04$  and  $P=0.01$ , respectively), but not of canvasbacks ( $P=0.25$ ; Fig. 7). Salt gland secretion rate varied among species ( $P=0.0003$ ; goldeneyes>mallards>canvasbacks) and was increased by saline acclimation only in mallards (Fig. 7).

### Discussion

Kidneys and salt glands of marine birds act interactively to maintain the volume and composition of body fluids within some homeostatically controlled range. The salt glands secrete excess NaCl as a hypertonic fluid and are the primary site of  $\text{Na}^+$  excretion, while the kidneys rid the body of excess water, nitrogenous wastes and other osmolytes. To this end, kidneys of marine birds should maintain a high GFR and a high tubular reabsorption of  $\text{Na}^+$  and water. Therefore, secretion of excess NaCl directly reflects renal  $\text{Na}^+$  filtration and reabsorption. This study simultaneously compared the filtration and reabsorption of  $\text{Na}^+$  and water from the kidneys, and secretion of  $\text{Na}^+$  by the salt glands in three species of ducks of utilize habitats of different salinities.

### Kidney function

Saline acclimation and acute saline loading have little effect on GFR of ducks (Holmes et al., 1968; Hughes, 1980; Hughes et al., 1989, 1999; Fig. 4) or other species with salt glands (Douglas, 1966; Hughes, 1995). GFR of goldeneyes is roughly twice that of mallards, canvasbacks and Pekin ducks (Table 1, Fig. 4), but is similar to that of other marine birds (gulls; Douglas, 1966; Hughes, 1980, 1995; Hughes et al., 1993). The Canada goose *Branta canadensis*, the most terrestrial of the anseriforms studied to date, has the lowest GFR (Hughes, 1980). This suggests that birds well adapted to highly saline water have higher GFR, and that GFR may vary among habitat types. We examined the generality of this relationship by comparing GFR of 27 species of adult birds for which data are available (Table 1). GFR varied

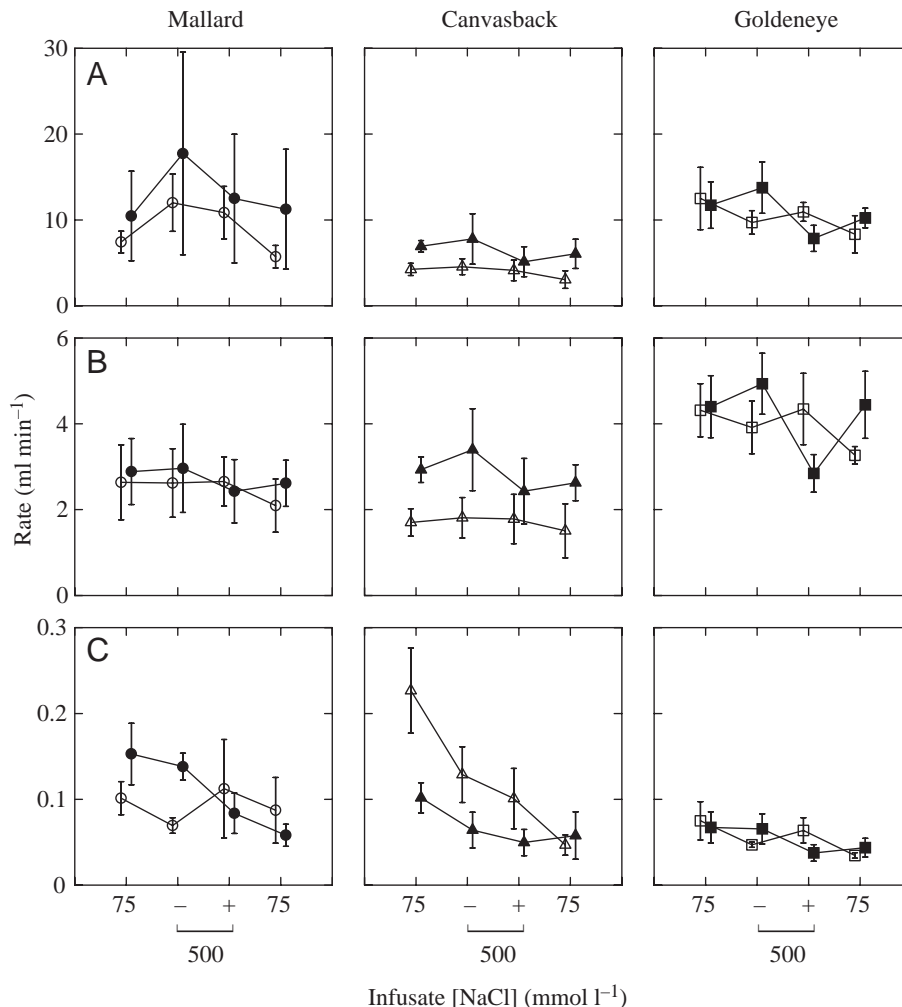

Fig. 4. Effect of hypotonic and hypertonic saline infusion ( $75$  and  $500 \text{ mmol l}^{-1}$  NaCl, respectively) on (A) effective renal plasma flow (ERPF), (B) glomerular flow rate (GFR) and (C) urine flow rate (UFR) in freshwater (open symbols) and saline-acclimated (filled symbols) mallards *Anas platyrhynchos* (circles), canvasbacks *Aythya valisineria* (triangles) and Barrow's goldeneyes *Bucephala islandica* (squares). The period of  $500 \text{ mmol l}^{-1}$  NaCl infusion was subdivided into two parts: the period prior to secretion (–) and the period of secretion (+). Values are means  $\pm$  S.E.M. ( $N=4$  ducks per treatment).

significantly among birds from different habitat types ( $P=0.02$ ; Figs 8, 9). Marine species had a significantly higher GFR ( $P=0.02$ ) and terrestrial arid species had a significantly lower GFR ( $P=0.05$ ) than species from either terrestrial mesic or freshwater habitats, which did not differ significantly from each other ( $P=0.9$ ).

Yokota et al. (1985) identified the need to eliminate water loads and metabolic wastes as the major factors that tend to increase GFR among vertebrates. The results of the preceding analysis support this hypothesis. The high GFR of marine birds is consistent with their larger kidneys (Hughes, 1970; Kalisińska et al., 1999), greater water flux (Hughes et al., 1987; Nagy and Peterson, 1988; Bennett, 2002) and  $\text{Na}^+$  flux (Goldstein and Bradshaw, 1998a; Goldstein, 2002) and larger extracellular fluid volumes (Bennett, 2002).

Marine birds are carnivorous and should presumably excrete large amounts of urates. Whether these patterns reflect adaptations to a marine environment and/or effects of a carnivorous diet have not yet been examined. Only one terrestrial avian carnivore, the American kestrel *Falco sparverius*, has been studied and it has a low GFR (Lyons and Goldstein, 2002; Table 1) and small kidneys, like other birds that lack salt glands (Hughes, 1970). We found no relationship between diet and GFR, standardized to body mass ( $P=0.58$ ; Table 1). Large renal mass and a high rate of body fluid filtration appear to be adaptations to the saline environment. Studies on terrestrial avian carnivores, including Falconiform birds that have salt glands (Cade and Greenwald, 1966), might clarify these relationships.

Goldeneyes, the most marine of the three duck species, have the highest fractional reabsorption of water and  $\text{Na}^+$  (Fig. 5), thus a low UFR (Fig. 4) and  $[\text{Na}^+]_u$  (Fig. 2). They significantly increased the fractional reabsorption of water and decreased the fractional reabsorption of  $\text{Na}^+$  when infused with hypertonic saline (Fig. 5), as did gulls (Hughes, 1995). In contrast, mallards had a lower fractional reabsorption of water and  $\text{Na}^+$  (Fig. 5) and produced a greater volume of urine (Fig. 4) that had a higher  $[\text{Na}^+]_u$  (Fig. 2). Although canvasbacks produced a large volume of urine like mallards (Fig. 4), they had a low  $[\text{Na}^+]_u$  like goldeneyes (Fig. 2). Saline infusion did not affect fractional reabsorption of water and  $\text{Na}^+$  in mallards and canvasbacks (Fig. 5).

Birds can adjust UFR by two mechanisms: they may vary the rate of fluid delivery to the renal tubules (GFR) and/or adjust tubular water reabsorption. Neither GFR nor fractional water reabsorption of the three species of wild ducks were much affected by saline acclimation or by acute saline loading (Figs 4, 5). With the exception of female freshwater canvasbacks, both mechanisms regulated urine flow of ducks equally well (Fig. 6). Chickens (Wideman, 1988), red wattlebirds *Anthochaera carunculata* (Goldstein and Bradshaw, 1998b) and kestrels (Lyons and Goldstein, 2002) also use both mechanisms to adjust urine flow. Fractional reabsorption of water is considered the more important regulator of urine flow in wattlebirds (Goldstein and Bradshaw, 1998b) and probably Chukars *Alectoris chukar* (Goldstein, 1990).

ERPF of mallards and goldeneyes (Fig. 4) is similar to ERPF of gulls (Raveendran, 1987) and galahs (Roberts, 1991b), but

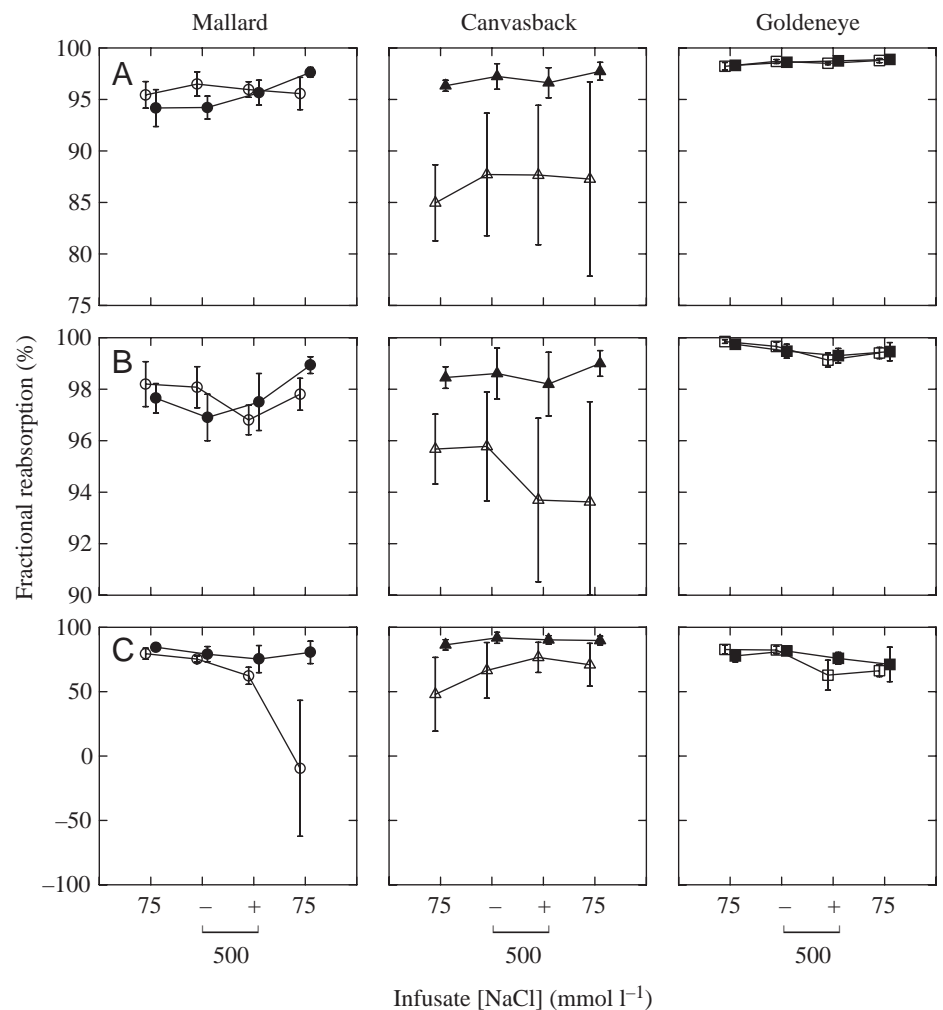

Fig. 5. Effect of hypotonic and hypertonic saline infusion (75 and 500  $\text{mmol l}^{-1}$  NaCl, respectively) on the fractional reabsorption of (A) water, (B) sodium and (C) potassium in freshwater (open symbols) and saline-acclimated (filled symbols) mallards *Anas platyrhynchos* (circles), canvasbacks *Aythya valisineria* (triangles) and Barrow's goldeneyes *Bucephala islandica* (squares). The period of 500  $\text{mmol l}^{-1}$  NaCl infusion was subdivided into two parts: the period prior to secretion (-) and the period of secretion (+). Values are means  $\pm$  S.E.M. ( $N=4$  ducks per treatment).

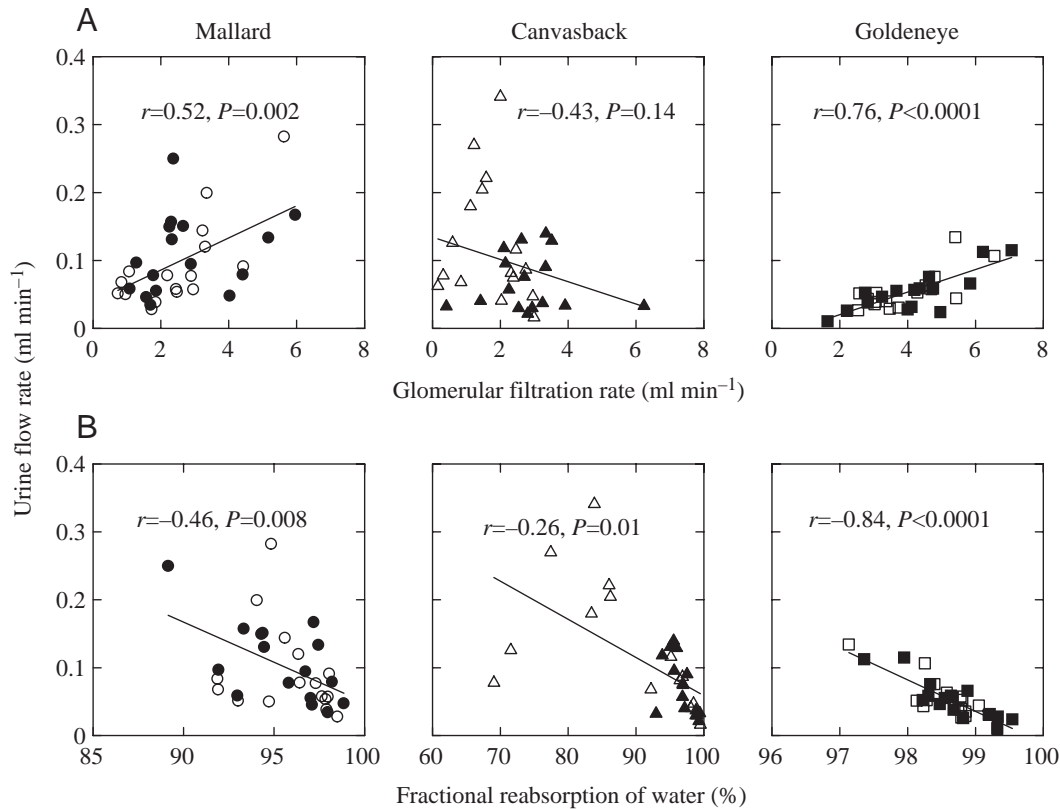

Fig. 6. Relationship between urine flow rate and (A) glomerular filtration rate and (B) the fractional reabsorption of water in freshwater (open symbols) and saline-acclimated (filled symbols) mallards *Anas platyrhynchos* (circles), canvasbacks *Aythya valisineria* (triangles) and Barrow's goldeneyes *Bucephala islandica* (squares).

lower than that of Pekin ducks, chickens and quail (Table 1). Canvasbacks (Fig. 4) have the lowest ERPF of any avian species studied, while domesticated varieties of birds (chicken and Pekin duck) have the highest ERPF (Table 1). We found no relationship between ERPF (Table 1), standardized to body mass (Fig. 8), and habitat ( $P=0.92$ ; Fig. 9). Species differences in ERPF do not suggest any significant pattern, as other attributes of avian osmoregulation, such as water flux, extracellular fluid volume and kidney size, appear to do.

#### Salt gland function

$[Na^+]_{SGS}$ , of saline infused ducks, did not differ among the three species, and was higher following saline acclimation only in mallards and goldeneyes (Fig. 7). Salt gland secretion rate did differ among the three species and was highest in goldeneyes (Fig. 7). Only goldeneyes secreted all the infused  $Na^+$  via their salt glands. Goldeneyes were able to drink 550 mmol l<sup>-1</sup> NaCl without changing water intake, yet never secreted when handled during saline acclimation (Bennett, 2002). Saline-acclimated mallards did excrete all infused  $Na^+$ , but incorporated renal excretion to do so. Canvasbacks were unable to excrete all the infused  $Na^+$ . At salinities above 225 mmol l<sup>-1</sup>

NaCl, mallards decreased water flux (drinking), but canvasbacks tolerated 450 mmol l<sup>-1</sup> NaCl with no change in water flux (Bennett, 2002). The SGS of saline infused canvasbacks is more concentrated than their drinking water, yet is produced at a low rate (Fig. 7). Their limited extrarenal  $Na^+$  excretion, together with their low renal  $Na^+$  excretion (Fig. 2), suggest they should be unable to eliminate all the  $Na^+$  they ingested (Bennett, 2002). Nevertheless, they tolerated

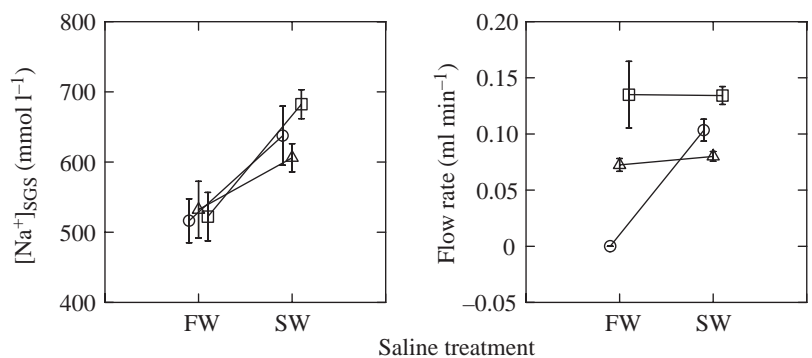

Fig. 7. Salt gland secretion  $[Na^+]$  and flow rate in freshwater (open symbols) and saline-acclimated (filled symbols) mallards *Anas platyrhynchos* (circles), canvasbacks *Aythya valisineria* (triangles) and Barrow's goldeneyes *Bucephala islandica* (squares) infused intravenously with 500 mmol l<sup>-1</sup> NaCl at 0.175 ml min<sup>-1</sup>. Values are means  $\pm$  S.E.M. ( $N=4$  ducks per treatment).



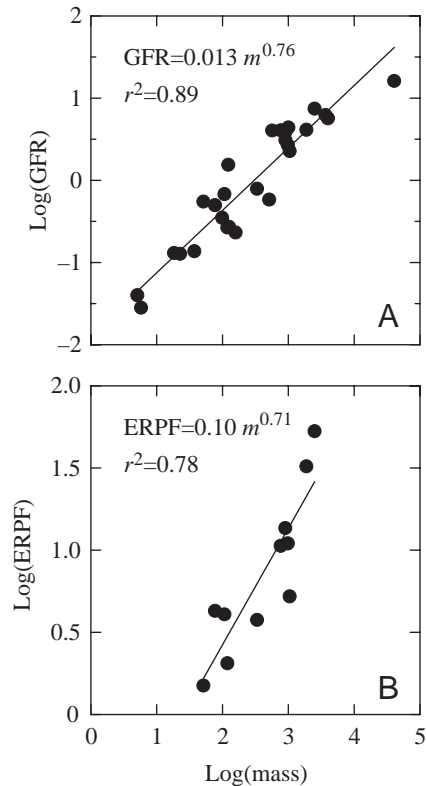

Fig. 8. (A) Glomerular filtration rate (GFR) and (B) effective renal plasma flow (ERPF) as a function of body mass ( $m$ ) in birds. Data and sources are given in Table 1.

450 mmol l<sup>-1</sup> NaCl (Bennett, 2002). How they did so, despite their apparently limited ability to excrete Na<sup>+</sup>, remains unresolved, but may involve water and Na<sup>+</sup> transport by the anterior and posterior segments of the intestinal tract.

This paradox could be satisfied if the gut did not absorb all the ingested Na<sup>+</sup>. There is some evidence that this may be so. Pekin ducks drink approximately 225 ml kg<sup>-1</sup> day<sup>-1</sup> (Fletcher and Holmes 1968; Bennett et al., 2003). If they drink 300 mmol l<sup>-1</sup> NaCl, their estimated Na<sup>+</sup> flux would be 67.5 mmol l<sup>-1</sup> kg<sup>-1</sup> day<sup>-1</sup>, but Na<sup>+</sup> flux measured by <sup>22</sup>Na turnover was only 21.4 mmol l<sup>-1</sup> kg<sup>-1</sup> day<sup>-1</sup> (Roberts and Hughes, 1984). We are currently examining Na<sup>+</sup> balance in the three species of ducks used in this study.

Many species of birds modify their urine in the lower intestinal tract to conserve water and/or Na<sup>+</sup>. For example, water and Na<sup>+</sup> excretion rates of chickens (Skadhauge, 1968) and quail (Anderson and Braun, 1985) are higher in ureteral urine than in voided urine (cloacal fluid). Schmidt-Nielson et al. (1963) suggested that birds with salt glands might reabsorb Na<sup>+</sup> and water from the urine in the lower intestinal tract. By secreting the reabsorbed Na<sup>+</sup> extrarenally in less water than was absorbed with it, they could generate osmotically free water. Postrenal modification of urine has the potential to play an important osmoregulatory role in ducks. Pekin ducks (Hughes and Raveendran, 1994) and mallards (Hughes et al., 1999) reflux urine into their hindgut. Mallards reflux about

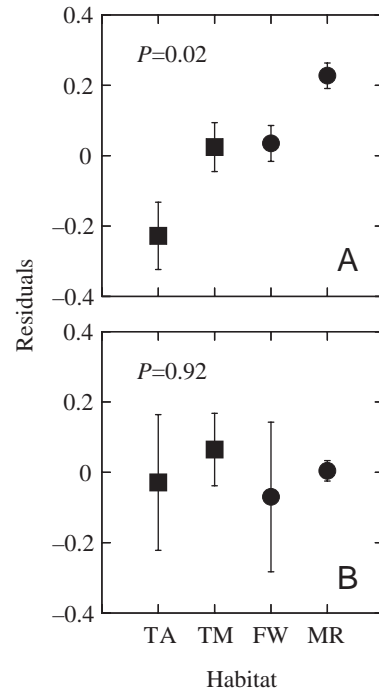

Fig. 9. Comparison of (A) glomerular filtration rate (GFR) and (B) effective renal plasma flow (ERPF) of birds in relation to habitat type (TA, terrestrial arid; TM, terrestrial mesic; FW, freshwater; MR, marine). Data are calculated from residuals of logGFR or logERPF on log(body mass) (Fig. 8; raw data and sources are given in Table 1) and are expressed as mean residual values  $\pm$  S.E.M.

20% of their urine, regardless of drinking water salinity (Hughes et al., 1999). The capacity for Na<sup>+</sup> uptake in the hindgut of Pekin ducks is only slightly diminished by saline acclimation (Skadhauge et al., 1984), and their cloacal fluid (Hughes et al., 1992) is more concentrated than their urine (Hughes et al., 2003). Postrenal modification of urine may help explain the inconsistencies in osmoregulatory responses of canvasback ducks.

### Morphology

It is interesting to speculate on the morphological basis for the differences in kidney and salt gland function observed in this study. The larger kidneys and GFR of goldeneyes, and marine birds in general, presumably reflect an increased number of glomeruli. But whether the higher fractional reabsorption of water and Na<sup>+</sup> (Fig. 5) and urine-concentrating capacity (Fig. 1) is due to a higher proportion of mammalian-type nephrons and fewer reptilian-type nephrons is not known. The proportion of kidney mass composed of medullary cones is high in marine species (Goldstein and Braun, 1989; Goldstein, 1993), which presumably reflects a high proportion of mammalian-type nephrons. Wideman and Nissley (1992) found that domestic chickens that thrived on saline drinking water had higher ratios of mammalian-type to reptilian-type nephron as compared to those that lost body mass.

Staaland (1967) examined the anatomical basis for

variations in salt gland function in Charadriiform birds. He found that the SGS concentration was correlated with the length of the secretory tubule. Although SGS rate was not measured in that study, Staaland (1967) suggested that salt gland size, and presumably the number of lobules, determines SGS flow rate. Given that we found SGS flow rate and not  $[Na^+]_{SGS}$  differed among the three species measured in this study (Fig. 7), it could be argued that goldeneyes have relatively larger salt glands, containing more lobules, than either mallards or canvasbacks, but all three species have similar lobular anatomy (secretory tubule length).

### Conclusions

We hypothesized that (1) neither saline acclimation nor acute saline loading affect GFR in any of the three species, and (2) saline tolerance is determined by the efficiency of renal tubular reabsorption of water and  $Na^+$ , and secretion of  $Na^+$  by the salt glands. The results support both hypotheses. Goldeneyes, the most marine species, had the highest rates of filtration (GFR), fractional reabsorption of water and  $Na^+$ , and salt gland  $Na^+$  excretion and were the only species that secreted all the infused  $Na^+$  via the salt glands. Rates of these processes were all lower in mallards, the most freshwater species. However, the high volume and  $Na^+$  concentration of urine of saline-acclimated mallards, coupled with extrarenal  $Na^+$  secretion, eliminated all the infused  $Na^+$ . If mallards infused with  $500\text{ mmol l}^{-1}$   $NaCl$  can excrete all infused  $Na^+$ , why can they not drink greater than  $300\text{ mmol l}^{-1}$   $NaCl$ ? In contrast, canvasbacks were unable to excrete all the infused  $Na^+$ , yet tolerated higher drinking water salinities than mallards (Bennett, 2002). This suggests that osmoregulation of canvasbacks involves levels of  $Na^+$  and water regulation by organs other than the kidneys and the salt glands. It may be that the intestinal tract plays an important role in conservation of water in canvasbacks.

We thank Anne Cheng and Susan Lee for assisting with this experiment and Arthur Van Der Horst and Sam Gopaul for excellent care of our experimental birds. We thank Drs Lee Gass and John Gosline for their comments on earlier drafts of this manuscript. We thank Todd McWhorter and Dr Scott Medler for their unpublished data. This research was conducted in accordance with the guidelines set forth by the Canadian Council on Animal Care and was supported by the Natural Sciences and Engineering Research Council of Canada (Grant A-3442, to M.R.H.). Manuscript preparation was supported by a grant contributed by Dr G. C. Hughes.

### References

- Anderson, G. L. (1980). Kidney function and postrenal modification of urine in desert quail. PhD thesis, University of Arizona, USA. pp. 187.
- Anderson, G. L. and Braun, E. J. (1985). Postrenal modification of urine in birds. *Am. J. Physiol.* **248**, R93-R98.
- Bennett, D. C. (2002). Effect of saline intake on osmotic homeostasis in ducks. PhD thesis, University of British Columbia, Vancouver, Canada. pp. 114.
- Bennett, D. C., Gray, D. A. and Hughes, M. R. (2003). Effect of saline intake on water flux and osmotic homeostasis in Pekin ducks (*Anas platyrhynchos*). *J. Comp. Physiol. B* **173**, 27-36.
- Bennett, D. C., Hughes, M. R., Elliott, J. E., Scheuhammer, A. M. and Smits, J. E. (2000). Effect of cadmium on Pekin duck total body water, water flux, renal filtration, and salt gland function. *J. Toxicol. Environ. Health A* **59**, 43-56.
- Berger, L., Yu, T. F. and Gutman, A. B. (1960). Effects of drugs that alter uric acid excretion in man on uric acid clearance in the chicken. *Am. J. Physiol.* **198**, 575-580.
- Bradley, E. L. and Holmes, E. L. (1971). The effects of hypophysectomy on adrenocortical function in the duck (*Anas platyrhynchos*). *J. Endocrinol.* **49**, 437-457.
- Braun, E. J. (1976). Intrarenal blood flow distribution in the desert quail following salt loading. *Am. J. Physiol.* **231**, 1111-1118.
- Braun, E. J. (1978). Renal response of the starling. *Am. J. Physiol.* **234**, F270-F278.
- Braun, E. J. and Dantzler, W. H. (1972). Function of mammalian-type and reptilian-type nephrons in kidney of desert quail. *Am. J. Physiol.* **222**, 617-629.
- Braun, E. J. and Dantzler, W. H. (1974). Effects of ADH on single-nephron glomerular filtration rates in the avian kidney. *Am. J. Physiol.* **226**, 1-8.
- Braun, E. J. and Dantzler, W. H. (1975). Effects of water load on renal glomerular and tubular function in desert quail. *Am. J. Physiol.* **229**, 222-228.
- Cade, T. J. and Greenwald, L. (1966). Nasal salt gland in falconiform birds. *Condor* **68**, 338-350.
- Chan, M. Y., Bradley, E. L. and Holmes, W. N. (1972). The effects of hypophysectomy on the metabolism of adrenal steroids in the pigeon (*Columba livia*). *J. Endocrinol.* **52**, 435-450.
- Clark, N. B. and Wideman, R. F., Jr (1980). Calcitonin stimulation of urine flow and sodium excretion in the starling. *Am. J. Physiol.* **238**, R406-R412.
- Dantzler, W. H. (1966). Renal response of chickens to infusion of hypertonic sodium chloride solution. *Am. J. Physiol.* **210**, 640-646.
- Dawson, T. J., Maloney, S. K. and Skadhauge, E. (1991). The role of the kidney in electrolyte and nitrogen excretion in a large flightless bird, the emu, during different osmotic regimes, including dehydration and nesting. *J. Comp. Physiol. B* **161**, 165-171.
- Douglas, D. S. (1966). Low urine salt concentrations in salt loaded gulls. *Physiologist* **9**, 171.
- Fletcher, G. L. and Holmes, W. N. (1968). Observations on the intake of water and electrolytes by the duck (*Anas platyrhynchos*) maintained on freshwater and on hypertonic saline. *J. Exp. Biol.* **49**, 325-329.
- Gerstberger, R., Kaul, R., Gray, D. A. and Simon, E. (1985). Arginine vasotocin and glomerular filtration rate in salt-acclimated ducks. *Am. J. Physiol.* **248**, F663-F667.
- Glahn, R. P., Wideman, R. F., Jr and Cowen, B. S. (1988a). Effect of dietary acidification and alkalization on urolith formation and renal function in single comb white leghorn laying hen. *Poult. Sci.* **67**, 1694-1701.
- Glahn, R. P., Wideman, R. F., Jr and Cowen, B. S. (1988b). Effect of gray strain infectious bronchitis virus and high dietary calcium on renal function of single comb white leghorn pullets at 6, 10, and 18 weeks of age. *Poult. Sci.* **67**, 1250-1263.
- Goldstein, D. L. (1990). Effects of different sodium intakes on renal and cloacal sodium excretion in chukars (Aves: Phasianidae). *Physiol. Zool.* **63**, 408-419.
- Goldstein, D. L. (1993). Renal response to saline infusion in chicks of Leach's storm petrels (*Oceanodroma leucorhoa*). *J. Comp. Physiol. B* **163**, 167-173.
- Goldstein, D. L. (2002). Water and salt balance in seabirds. In *Biology of Marine Birds* (ed. E. A. Schreiber and J. Burger), pp. 467-483. London: CRC Press.
- Goldstein, D. L. and Bradshaw, S. D. (1998a). Regulation of water and sodium balance in the field by Australian Honeyeaters (Aves: Meliphagidae). *Physiol. Zool.* **71**, 214-225.
- Goldstein, D. L. and Bradshaw, S. D. (1998b). Renal function in red wattlebirds in response to varying fluid intake. *J. Comp. Physiol. B* **168**, 265-272.
- Goldstein, D. L. and Braun, E. J. (1988). Contributions of the kidneys and intestines to water conservation, and plasma levels of antidiuretic hormone, during dehydration in house sparrows (*Passer domesticus*). *J. Comp. Physiol. B* **158**, 353-361.
- Goldstein, D. L. and Braun, E. J. (1989). Structure and concentrating ability in the avian kidney. *Am. J. Physiol.* **256**, R501-R509.
- Goldstein, D. L. and Rothschild, E. L. (1993). Daily rhythms in rates of

- glomerular filtration and cloacal excretion in captive and wild song sparrows (*Melospiza melodia*). *Physiol. Zool.* **66**, 708-719.
- Gray, D. A. and Erasmus, T.** (1988). Glomerular filtration changes during vasotocin-induced antidiuresis in kelp gull. *Am. J. Physiol.* **255**, R936-R939.
- Gregg, C. M. and Wideman, F. R., Jr** (1990). Morphological and functional comparisons of normal and hypertrophied kidneys of adult domestic fowl (*Gallus gallus*). *Am. J. Physiol.* **258**, F403-F413.
- Harriman, A. E.** (1967). Laughing gulls offered saline in preference and survival tests. *Physiol. Zool.* **49**, 273-278.
- Holmes, W. N. and Adams, B. M.** (1963). Effects of adrenocortical and neurohypophysial hormones on the renal excretory pattern in the water-loaded duck (*Anas platyrhynchos*). *Endocrinol.* **73**, 5-10.
- Holmes, W. N., Fletcher, G. L. and Stewart, D. J.** (1968). The patterns of renal electrolyte excretion in the duck (*Anas platyrhynchos*) maintained on freshwater and on hypertonic saline. *J. Exp. Biol.* **45**, 487-508.
- Hughes, M. R.** (1970). Relative kidney size in nonpasserine birds with salt glands. *Condor* **72**, 164-168.
- Hughes, M. R.** (1980). Glomerular filtration rate in saline acclimated ducks, gulls and geese. *Comp. Biochem. Physiol.* **65A**, 211-213.
- Hughes, M. R.** (1995). Responses of gull kidneys and salt glands to NaCl-loading. *Can. J. Physiol. Pharmacol.* **73**, 1727-1732.
- Hughes, M. R., Bennett, D. C., Gray, D. A., Sharp, P. J., Elliott, J. E. and Scheuhammer, A. M.** (2003). Effects of cadmium ingestion on plasma and osmoregulatory hormone concentrations in male and female Pekin ducks. *J. Toxicol. Environ. Health A* **66**, 71-85.
- Hughes, M. R., Bennett, D. C., Sullivan, T. M. and Hwang, H.** (1999). Retrograde movement of urine into the gut of salt water acclimated Mallards (*Anas platyrhynchos*). *Can. J. Zool.* **77**, 342-346.
- Hughes, M. R., Goldstein, D. L. and Raveendran, L.** (1993). Osmoregulatory responses of Glaucous-winged gulls (*Larus glaucescens*) to dehydration and hemorrhage. *J. Comp. Physiol. B* **163**, 524-531.
- Hughes, M. R., Kojwang, D. and Zenteno-Savin, T.** (1992). Effects of cecal ligation and saline acclimation on plasma concentration and organ mass in male and female Pekin ducks, *Anas platyrhynchos*. *J. Comp. Physiol. B* **162**, 625-631.
- Hughes, M. R. and Raveendran, L.** (1994). Ion and luminal marker concentrations in the gut of saline-acclimated ducks. *Condor* **96**, 295-299.
- Hughes, M. R., Roberts, J. R. and Thomas, B. R.** (1987). Total body water and its turnover in free-living nestling Glaucous-winged gulls with a comparison of body water and water flux in avian species with and without salt glands. *Physiol. Zool.* **60**, 481-491.
- Hughes, M. R., Roberts, J. R. and Thomas, B. R.** (1989). Renal function in freshwater and chronically saline-stressed male and female Pekin ducks. *Poult. Sci.* **68**, 408-416.
- Hyden, S. and Knutson, P.-G.** (1959). Renal clearance and distribution volume of polyethylene glycol and inulin in the chicken. *Kungl. Lantbrukshögskolans. Annaler.* **25**, 253-259.
- Kalisińska, E., Dańczak, A., Pierko, M. and Wysocki, D.** (1999). Relationships between kidney mass and body size in some Anseriformes. *Anat. Histol. Embryol.* **28**, 55-59.
- Korr, I. M.** (1939). The osmotic function of the chicken kidney. *J. Cell. Comp. Physiol.* **13**, 175-193.
- Krag, B. and Skadhauge, E.** (1972). Renal salt and water excretion in the budgerygah (*Melopsittacus undulatus*). *Comp. Biochem. Physiol.* **41A**, 667-683.
- Laverty, G. and Dantzler, W. H.** (1982). Micropuncture of superficial nephrons in avian (*Sturnus vulgaris*) kidney. *Am. J. Physiol.* **243**, F561-F569.
- Laverty, G. and Dantzler, W. H.** (1983). Micropuncture study of urate transport by superficial nephrons in avian (*Sturnus vulgaris*) kidney. *Pflüg. Arch.* **397**, 232-236.
- Laverty, G. and Wideman, R. F., Jr** (1989). Sodium excretion rates and renal responses to acute salt loading in the European starling. *J. Comp. Physiol. B* **259**, 401-408.
- Leary, A. M., Roberts, J. R. and Sharp, P. J.** (1998). The effect of infusion of hypertonic saline on glomerular filtration rate and arginine vasotocin, prolactin and aldosterone in the domestic chicken. *J. Comp. Physiol. B* **168**, 313-321.
- Lyons, M. E. and Goldstein, D. L.** (2002). Osmoregulation by nestling and adult American Kestrels (*Falco sparverius*) *Auk* **119**, 426-435.
- Nagy, K. A. and Peterson, C. C.** (1988). Scaling of water flux rate in animals. *Univ. Calif. Publ. Zool.* **120**.
- Nechay, B. R. and Nechay, L.** (1959). Effects of probenidicid, sodium salicylate, 2,4-dinitrophenol and pyrazinamide on renal secretion of uric acid in chickens. *J. Pharmacol. Exp. Ther.* **126**, 291-295.
- Orloff, J. and Davidson, D. G.** (1959). The mechanism of potassium secretion in the chicken. *J. Clin. Invest.* **38**, 21-30.
- Palmore, W. P., Fregly, M. J. and Simpson, C. F.** (1981). Catecholamine-mediated diuresis in turkeys. *Proc. Soc. Exp. Biol. Med.* **167**, 1-5.
- Pitts, R. F.** (1938). The excretion of phenol red by chickens. *J. Cell. Comp. Physiol.* **11**, 99-115.
- Pitts, R. F.** (1968). *Physiology of the Kidney and Body Fluids*. 2<sup>nd</sup> Edition. Chicago, IL, USA: Year Book Medical Publishers Inc.
- Pitts, R. F. and Korr, I. M.** (1938). The excretion of urea by the bird. *J. Cell. Comp. Physiol.* **11**, 117-122.
- Radin, M. J., Hoepf, T. M. and Swayne, D. E.** (1993). Use of a single injection solute clearance method for the determination of glomerular filtration rate and effective renal plasma flow in chickens. *Lab. Animal Sci.* **43**, 594-596.
- Raveendran, L.** (1987). The effect of intravenous salt loading on osmoregulation of hydrated Glaucous-winged gulls, *Larus glaucescens*. MSc thesis, University of British Columbia, Vancouver, Canada.
- Roberts, J. R.** (1991a). Effects of water deprivation on renal function and plasma arginine vasotocin in the feral chicken, *Gallus gallus* (Phasianidae). *Aust. J. Zool.* **39**, 439-446.
- Roberts, J. R.** (1991b). Renal function and plasma arginine vasotocin during water deprivation in an Australian parrot, the galah (*Cacatua roseicapilla*). *J. Comp. Physiol.* **161B**, 620-625.
- Roberts, J. R.** (1992). Renal function and plasma arginine vasotocin during an acute salt load in feral chickens. *J. Comp. Physiol.* **162B**, 54-58.
- Roberts, J. R., Baudinette, R. V. and Wheldrake, J. F.** (1985). Renal clearance studies in Stubble Quail *Coturnix pectoralis* and King Quail *Coturnix chinensis* under conditions of hydration, dehydration, and salt loading. *Physiol. Zool.* **58**, 340-349.
- Roberts, J. R. and Dantzler, W. H.** (1989). Glomerular filtration rate in conscious unrestrained starlings under dehydration. *Am. J. Physiol.* **256**, R836-R839.
- Roberts, J. R. and Dantzler, W. H.** (1992). Micropuncture study of avian kidney effect of prolactin. *Am. J. Physiol.* **262**, R933-R937.
- Roberts, J. R. and Hughes, M. R.** (1983). Glomerular filtration rate and drinking rate in Japanese Quail, *Coturnix coturnix japonica*, in response to acclimation to saline water. *Can. J. Zool.* **61**, 2394-2398.
- Roberts, J. R. and Hughes, M. R.** (1984). The effects of hypertonic sodium chloride injection on body water distribution in ducks (*Anas platyrhynchos*), gulls (*Larus glaucescens*), and roosters (*Gallus domesticus*). *Comp. Biochem. Physiol.* **52A**, 21-28.
- Sanner, E.** (1965). Studies on biogenic amines and reserpine induced block of the diuretic action of hydrochlorothiazide and theophylline in the chicken. *Acta. Pharmacol. Toxicol.* **22(Suppl 1)**, 386.
- Schmidt-Nielsen, K.** (1960). The salt-secreting gland of marine birds. *Circulation* **21**, 955-967.
- Schmidt-Nielsen, K., Borut, A., Lee, P. and Crawford, E., Jr** (1963). Nasal salt excretion and the possible function of the cloaca in water conservation. *Science* **142**, 1300-1301.
- Schmidt-Nielsen, K. and Kim, Y.-T.** (1964). The effect of salt intake on the size and function of the salt glands in ducks. *Auk* **81**, 160-172.
- Schütz, H., Gray, D. A. and Gerstberger, R.** (1992). Modulation of kidney function in conscious Pekin ducks by atrial natriuretic factor. *Endocrinol.* **130**, 678-684.
- Shannon, J. A.** (1938a). The excretion of exogenous creatinine by the chicken. *J. Cell. Comp. Physiol.* **11**, 123-134.
- Shannon, J. A.** (1938b). The excretion of uric acid by the chicken. *J. Cell. Comp. Physiol.* **11**, 135-148.
- Shideman, J. R., Evans, R. L., Bierer, D. W. and Quebbemann, A. J.** (1981). Renal venous portal contribution to PAH and uric acid clearance in the chicken. *Am. J. Physiol.* **240**, F46-F53.
- Shoemaker, V. H.** (1967). Renal function in the morning dove. *Am. Zool.* **7**, 736.
- Simon, E. and Gray, D. A.** (1991). Control of renal handling of potassium loads in ducks with active salt glands. *Am. J. Physiol.* **261**, R231-R238.
- Singh, D. S. and Bhattacharyya, N. K.** (1983). Renal function in Hy-line layers fed sal-meal diets. *Indian J. Anim. Sci.* **53**, 349-350.
- Skadhauge, E.** (1964). The effect of unilateral infusion of arginine vasotocin into the portal circulation of the avian kidney. *Acta. Endocrinol. (Copenhagen)* **47**, 3221-330.
- Skadhauge, E.** (1968). The cloacal storage of urine in the rooster. *Comp. Biochem. Physiol.* **24**, 7-18.

- Skadhauge, E. and Schmidt-Nielsen, B.** (1967). Renal function in domestic fowl. *Am. J. Physiol.* **212**, 793-798.
- Skadhauge, E., Munck, B. G. and Rice, G. E.** (1984). Regulation of NaCl and water reabsorption in duck intestine. In *Lecture Notes on Coastal and Estuarine Studies*, Vol. 9. *Osmoregulation in estuarine and marine animals* (ed. A. Pequeux, R. Gilles and L. Bolis), pp. 131-142. New York: Springer-Verlag.
- Sperber, I.** (1960). Excretion. In *Biology and Physiology of Birds*, Vol. 1 (ed. A. J. Marshall), pp. 469-492. London: Academic Press.
- Staaland, H.** (1967). Anatomical and physiological adaptations of the nasal glands in Charadriiformes birds. *Comp. Biochem. Physiol.* **23**, 933-944.
- Svendson, C. and Skadhauge, E.** (1976). Renal function in hens fed graded levels of ochratoxin A. *Acta Pharmacol. Toxicol.* **38**, 186-194.
- Sykes, A. H.** (1960a). The renal clearance of uric acid and p-amino hippurate in the fowl. *Res. Vet. Sci.* **1**, 308-314.
- Sykes, A. H.** (1960b). The excretion of inulin, creatine and ferrocyanide by the fowl. *Res. Vet. Sci.* **1**, 315-320.
- Thomas, D. H. and Phillips, J. G.** (1975). Studies in avian adrenal steroid function III: Adrenalectomy and the renal-cloacal response in water-loaded domestic ducks (*Anas platyrhynchos* L.). *Gen. Comp. Endocrinol.* **26**, 412-419.
- Vena, V. E., Lac, T. H. and Wideman, R. F., Jr** (1990). Dietary sodium, glomerular filtration rate autoregulation, and glomerular size distribution profiles in domestic fowl (*Gallus gallus*). *J. Comp. Physiol. B* **160**, 7-16.
- Vogel, G., Stoeckert, I., Kroger, W. and Dobberstein, I.** (1965). Harn und Harnbereitung bei terrestrisch lebenden Vögeln: Untersuchungen am Truthuhn (*Meleagris pavo* L.). *Zentralbl. Veterinarmed. Reihe A* **12**, 132-160.
- Walter, A. and Hughes, M. R.** (1978). Total body water volume and turnover rate in fresh water and sea water adapted Glaucous-winged gulls, *Larus glaucescens*. *Comp. Biochem. Physiol.* **61A**, 233-237.
- Wideman, R. F., Jr** (1988). Avian kidney anatomy and physiology. *CRC Crit. Rev. Poult. Biol.* **1**, 133-176.
- Wideman, R. F., Jr, Clark, N. B. and Braun, E. J.** (1980). Effects of phosphate loading and parathyroid hormone on starling renal phosphate excretion. *Am. J. Physiol.* **239**, F233-F243.
- Wideman, R. F., Jr and Gregg, C. M.** (1988). Model for evaluating avian renal hemodynamics and glomerular filtration rate autoregulation. *Am. J. Physiol.* **254**, R925-R932.
- Wideman, R. F., Jr and Laverty, G.** (1986). Kidney function in domestic fowl with chronic occlusion of the ureter and caudal renal vein. *Poult. Sci.* **65**, 2148-2155.
- Wideman, R. F., Jr and Nissley, A. C.** (1992). Kidney structure and responses of two commercial single comb white leghorn strains to saline in the drinking water. *Brit. Poult. Sci.* **33**, 489-504.
- Wideman, R. F., Jr and Satnick, J. L.** (1989). Physiological evaluation of diuresis in commercial broiler breeders. *Brit. Poult. Sci.* **30**, 313-326.
- Wideman, R. F., Jr, Satnick, J. L., Mitsos, W. J., Bennett, K. R. and Smith, S. R.** (1987). Effect of saline adaptation and renal portal sodium infusion on glomerular size distributions and kidney function in domestic fowl. *Poult. Sci.* **66**, 348-356.
- Williams, J. B. and Braun, E. J.** (1996). Renal compensation for cecal loss in Gambel's quail (*Callipepla gambelii*). *Comp. Biochem. Physiol.* **113A**, 333-341.
- Williams, J. B., Pacelli, M. M. and Braun, E. J.** (1991). The effect of water deprivation on renal function in conscious unrestrained gambel's quail (*Callipepla gambelii*). *Physiol. Zool.* **64**, 1200-1216.
- Yokota, S. D., Benyajati, S. and Dantzler, W. H.** (1985). Comparative aspects of glomerular filtration in vertebrates. *Renal Physiol. Basel* **8**, 193-221.
